# Supplementary material
Source: publisher site journal article supplement (http://www.spandidos-publications.com/4303/downloadSupplementary)
Supplement: Supplementary file 1 [file downloadSupplementary]

## Sheet: Supplementary File 11
Table SXI. The number of known ASEs (KASEs) and novel ASEs (NASEs) in the siDEK-treated cells.
#Sample	All ASE	Known ASEs (KASEs )	KASEs (%)	Novel ASEs (NASEs)	NASEs (%)
siCtrl_1st	24021	10582	0.4405	13439	0.5595
siCtrl_2nd	23932	10312	0.4309	13620	0.5691
siCtrl_3rd	28003	12234	0.4369	15769	0.5631
siDEK_1st	24257	10712	0.4416	13545	0.5584
siDEK_2nd	24448	10759	0.4401	13689	0.5599
siDEK_3rd	25185	11130	0.4419	14055	0.5581
Total	58765	16536	0.2814	42229	0.7186
